# Supplementary material for: Metabolomic Profiling of the Desiccation-Tolerant Medicinal Shrub Myrothamnus flabellifolia Indicates Phenolic Variability Across Its Natural Habitat: Implications for Tea and Cosmetics Production
Source: MDPI journal article supplement (doi:10.3390/molecules24071240), 2019-03-29
Supplement: s1 [file s1]

**Table S1.** ANOVA and Fisher's post-hoc test results.

|                   | f.value | p.value    | LOG10(p) | FDR        | Fisher's LSD                                                                                                                                                                                                                                                                                                                                                                                                                                                                                                                                                                                                                                                                                                                                                                                                                                                                                                                                                                                                                                                                                                                                                                                                                                                                   |
|-------------------|---------|------------|----------|------------|--------------------------------------------------------------------------------------------------------------------------------------------------------------------------------------------------------------------------------------------------------------------------------------------------------------------------------------------------------------------------------------------------------------------------------------------------------------------------------------------------------------------------------------------------------------------------------------------------------------------------------------------------------------------------------------------------------------------------------------------------------------------------------------------------------------------------------------------------------------------------------------------------------------------------------------------------------------------------------------------------------------------------------------------------------------------------------------------------------------------------------------------------------------------------------------------------------------------------------------------------------------------------------|
| 447.09235/1435.39 | 225.44  | 2.6716e-18 | 17.573   | 8.2821e-17 | <p>Namibia_Etuisis - Malawi_Banja; Namibia_Grootberg - Malawi_Banja; Namibia_Opuwo - Malawi_Banja; Malawi_Banja - SouthAfrica_Waterberg; Namibia_Etuisis - Malawi_Ntcheu; Namibia_Grootberg - Malawi_Ntcheu; Namibia_Opuwo - Malawi_Ntcheu; Malawi_Ntcheu - SouthAfrica_Waterberg; Namibia_Etuisis - Malawi_Zomba; Namibia_Grootberg - Malawi_Zomba; Namibia_Opuwo - Malawi_Zomba; Malawi_Zomba - SouthAfrica_Waterberg; Namibia_Etuisis - SouthAfrica_Buffelskloof; Namibia_Etuisis - SouthAfrica_Waterberg; Namibia_Grootberg - SouthAfrica_Buffelskloof; Namibia_Grootberg - SouthAfrica_Waterberg; Namibia_Opuwo - SouthAfrica_Buffelskloof; Namibia_Opuwo - SouthAfrica_Waterberg; SouthAfrica_Buffelskloof - SouthAfrica_Waterberg</p> <p>Malawi_Banja - Namibia_Etuisis; Malawi_Banja - Namibia_Grootberg; Malawi_Banja - Namibia_Opuwo; Malawi_Ntcheu - Namibia_Etuisis; Malawi_Ntcheu - Namibia_Grootberg; Malawi_Ntcheu - Namibia_Opuwo; Malawi_Zomba - Namibia_Etuisis; Malawi_Zomba - Namibia_Grootberg; Malawi_Zomba - Namibia_Opuwo; SouthAfrica_Buffelskloof - Namibia_Etuisis; SouthAfrica_Waterberg - Namibia_Etuisis; SouthAfrica_Buffelskloof - Namibia_Grootberg; SouthAfrica_Waterberg - Namibia_Grootberg; SouthAfrica_Buffelskloof - Namibia_Opuwo;</p> |
| 477.06707/1102.95 | 129.57  | 7.9148e-16 | 15.102   | 1.2268e-14 | <p>SouthAfrica_Waterberg - Namibia_Opuwo</p> <p>Namibia_Etuisis - Malawi_Banja; Namibia_Grootberg - Malawi_Banja; Namibia_Opuwo - Malawi_Banja; Namibia_Etuisis - Malawi_Ntcheu; Namibia_Grootberg - Malawi_Ntcheu; Namibia_Opuwo - Malawi_Ntcheu; Namibia_Etuisis - Malawi_Zomba; Namibia_Grootberg - Malawi_Zomba; Namibia_Opuwo - Malawi_Zomba; Malawi_Zomba - SouthAfrica_Waterberg; Namibia_Etuisis - SouthAfrica_Buffelskloof; Namibia_Etuisis - SouthAfrica_Waterberg; Namibia_Grootberg - SouthAfrica_Buffelskloof; Namibia_Grootberg - SouthAfrica_Waterberg; Namibia_Opuwo - SouthAfrica_Buffelskloof; Namibia_Opuwo - SouthAfrica_Waterberg;</p>                                                                                                                                                                                                                                                                                                                                                                                                                                                                                                                                                                                                                    |
| 315.05037/1456.04 | 76.656  | 1.6077e-13 | 12.794   | 1.6613e-12 | <p>SouthAfrica_Buffelskloof - SouthAfrica_Waterberg</p> <p>Malawi_Banja - Namibia_Etuisis; Malawi_Banja - Namibia_Grootberg; Malawi_Banja - Namibia_Opuwo; Malawi_Ntcheu - Namibia_Etuisis; Malawi_Ntcheu - Namibia_Grootberg; Malawi_Ntcheu - Namibia_Opuwo; SouthAfrica_Waterberg - Malawi_Ntcheu; Malawi_Zomba - Namibia_Etuisis; Malawi_Zomba - Namibia_Grootberg; Malawi_Zomba - Namibia_Opuwo; SouthAfrica_Waterberg - Malawi_Zomba; SouthAfrica_Buffelskloof - Namibia_Etuisis; SouthAfrica_Waterberg - Namibia_Etuisis; SouthAfrica_Buffelskloof - Namibia_Grootberg; SouthAfrica_Waterberg - Namibia_Grootberg; SouthAfrica_Buffelskloof - Namibia_Opuwo; SouthAfrica_Waterberg - Namibia_Opuwo; SouthAfrica_Waterberg - SouthAfrica_Buffelskloof</p>                                                                                                                                                                                                                                                                                                                                                                                                                                                                                                                 |
| 431.19157/858.76  | 53.979  | 5.2301e-12 | 11.281   | 4.0533e-11 | <p>Namibia_Etuisis - Malawi_Banja; Namibia_Grootberg - Malawi_Banja; Namibia_Opuwo - Malawi_Banja; SouthAfrica_Buffelskloof - Malawi_Banja; SouthAfrica_Waterberg - Malawi_Banja; Namibia_Etuisis - Malawi_Ntcheu; Namibia_Grootberg - Malawi_Ntcheu; Namibia_Opuwo - Malawi_Ntcheu; SouthAfrica_Buffelskloof - Malawi_Ntcheu; SouthAfrica_Waterberg - Malawi_Ntcheu; Namibia_Etuisis - Malawi_Zomba; Namibia_Grootberg - Malawi_Zomba; Namibia_Opuwo - Malawi_Zomba; SouthAfrica_Buffelskloof - Malawi_Zomba; SouthAfrica_Waterberg - Malawi_Zomba; SouthAfrica_Buffelskloof - Namibia_Etuisis; SouthAfrica_Waterberg - Namibia_Etuisis; SouthAfrica_Buffelskloof - Namibia_Grootberg;</p>                                                                                                                                                                                                                                                                                                                                                                                                                                                                                                                                                                                    |
| 271.0812/107.62   | 43.954  | 3.8833e-11 | 10.411   | 2.4076e-10 | <p>SouthAfrica_Buffelskloof - Namibia_Opuwo; SouthAfrica_Waterberg - Namibia_Opuwo</p>                                                                                                                                                                                                                                                                                                                                                                                                                                                                                                                                                                                                                                                                                                                                                                                                                                                                                                                                                                                                                                                                                                                                                                                         |
| 647.08836/840.21  | 25.121  | 7.601e-09  | 8.1191   | 3.9272e-08 | <p>Malawi_Banja - SouthAfrica_Buffelskloof; Malawi_Ntcheu - Namibia_Opuwo; Malawi_Ntcheu - SouthAfrica_Buffelskloof; Malawi_Zomba - SouthAfrica_Buffelskloof; Namibia_Etuisis - Namibia_Opuwo;</p>                                                                                                                                                                                                                                                                                                                                                                                                                                                                                                                                                                                                                                                                                                                                                                                                                                                                                                                                                                                                                                                                             |

|                   |        |            |        |            |                                                                                                                                                                                                                                                                                                                                                                                                                                                                                                                                                                                                                                                                                                                                                                                                                               |
|-------------------|--------|------------|--------|------------|-------------------------------------------------------------------------------------------------------------------------------------------------------------------------------------------------------------------------------------------------------------------------------------------------------------------------------------------------------------------------------------------------------------------------------------------------------------------------------------------------------------------------------------------------------------------------------------------------------------------------------------------------------------------------------------------------------------------------------------------------------------------------------------------------------------------------------|
| 317.08729/341.39  | 18.35  | 1.2571e-07 | 6.9006 | 5.5671e-07 | Namibia_Etuisis - SouthAfrica_Buffelskloof; Namibia_Etuisis - SouthAfrica_Waterberg; Namibia_Grootberg - Namibia_Opuwo; Namibia_Grootberg - SouthAfrica_Buffelskloof; Namibia_Grootberg - SouthAfrica_Waterberg; Namibia_Opuwo - SouthAfrica_Buffelskloof; SouthAfrica_Waterberg - SouthAfrica_Buffelskloof<br>Malawi_Banja - Namibia_Etuisis; Malawi_Banja - Namibia_Opuwo; Malawi_Ntcheu - Namibia_Etuisis; Malawi_Ntcheu - Namibia_Opuwo; Malawi_Zomba - Namibia_Etuisis; Malawi_Zomba - Namibia_Opuwo; Namibia_Grootberg - Namibia_Etuisis; SouthAfrica_Buffelskloof - Namibia_Etuisis; SouthAfrica_Waterberg - Namibia_Etuisis; Namibia_Grootberg - Namibia_Opuwo; SouthAfrica_Buffelskloof - Namibia_Opuwo; SouthAfrica_Waterberg - Namibia_Opuwo                                                                       |
| 423.0925/722.6    | 16.518 | 3.1142e-07 | 6.5067 | 1.1759e-06 | Malawi_Banja - Namibia_Etuisis; Malawi_Banja - Namibia_Grootberg; Malawi_Banja - Namibia_Opuwo; Malawi_Ntcheu - Namibia_Grootberg; Malawi_Ntcheu - Namibia_Opuwo; Malawi_Zomba - Namibia_Etuisis; Malawi_Zomba - Namibia_Grootberg; Malawi_Zomba - Namibia_Opuwo; SouthAfrica_Buffelskloof - Namibia_Grootberg; SouthAfrica_Buffelskloof - Namibia_Opuwo<br>SouthAfrica_Buffelskloof - Malawi_Banja; SouthAfrica_Waterberg - Malawi_Banja; SouthAfrica_Buffelskloof - Malawi_Ntcheu; SouthAfrica_Waterberg - Malawi_Ntcheu; SouthAfrica_Buffelskloof - Malawi_Zomba; SouthAfrica_Waterberg - Malawi_Zomba; SouthAfrica_Buffelskloof - Namibia_Etuisis; SouthAfrica_Waterberg - Namibia_Etuisis; SouthAfrica_Buffelskloof - Namibia_Grootberg; SouthAfrica_Buffelskloof - Namibia_Opuwo; SouthAfrica_Waterberg - Namibia_Opuwo |
| 317.0865/107.4    | 16.341 | 3.4139e-07 | 6.4667 | 1.1759e-06 | Malawi_Banja - Namibia_Etuisis; Malawi_Banja - Namibia_Grootberg; Malawi_Banja - Namibia_Opuwo; Malawi_Ntcheu - Namibia_Etuisis; Malawi_Ntcheu - Namibia_Grootberg; Malawi_Ntcheu - Namibia_Opuwo; Malawi_Zomba - Namibia_Etuisis; Malawi_Zomba - Namibia_Grootberg; Malawi_Zomba - Namibia_Opuwo; SouthAfrica_Buffelskloof - Namibia_Etuisis; SouthAfrica_Waterberg - Namibia_Etuisis; SouthAfrica_Buffelskloof - Namibia_Grootberg; SouthAfrica_Waterberg - Namibia_Grootberg; SouthAfrica_Buffelskloof - Namibia_Opuwo; SouthAfrica_Waterberg - Namibia_Opuwo                                                                                                                                                                                                                                                              |
| 683.22481/100.94  | 13.189 | 2.0371e-06 | 5.691  | 6.3151e-06 | Malawi_Banja - Namibia_Etuisis; Malawi_Banja - Namibia_Opuwo; Malawi_Ntcheu - Namibia_Etuisis; Malawi_Ntcheu - Namibia_Opuwo; SouthAfrica_Buffelskloof - Namibia_Etuisis; SouthAfrica_Waterberg - Namibia_Etuisis; SouthAfrica_Buffelskloof - Namibia_Opuwo; SouthAfrica_Waterberg - Namibia_Opuwo                                                                                                                                                                                                                                                                                                                                                                                                                                                                                                                            |
| 271.08167/341.24  | 12.964 | 2.3435e-06 | 5.6301 | 6.6045e-06 | Namibia_Etuisis; SouthAfrica_Buffelskloof - Namibia_Opuwo; SouthAfrica_Waterberg - Namibia_Opuwo<br>Namibia_Opuwo - Malawi_Banja; Namibia_Etuisis - Malawi_Ntcheu; Namibia_Grootberg - Malawi_Ntcheu; Namibia_Opuwo - Malawi_Ntcheu; Namibia_Etuisis - Malawi_Zomba; Namibia_Grootberg - Malawi_Zomba; Namibia_Opuwo - Malawi_Zomba                                                                                                                                                                                                                                                                                                                                                                                                                                                                                           |
| 300.99848/1084.11 | 8.0192 | 9.0106e-05 | 4.0452 | 7          | Malawi_Banja - SouthAfrica_Buffelskloof; Malawi_Ntcheu - SouthAfrica_Buffelskloof; Malawi_Zomba - SouthAfrica_Buffelskloof; Namibia_Etuisis - SouthAfrica_Buffelskloof; Namibia_Grootberg - SouthAfrica_Buffelskloof; Namibia_Opuwo - SouthAfrica_Buffelskloof                                                                                                                                                                                                                                                                                                                                                                                                                                                                                                                                                                |
| 495.07765/682.7   | 7.1827 | 0.00019277 | 3.715  | 8          | Malawi_Banja - SouthAfrica_Buffelskloof; Malawi_Ntcheu - SouthAfrica_Buffelskloof; Malawi_Zomba - SouthAfrica_Buffelskloof; Namibia_Etuisis - SouthAfrica_Buffelskloof; Namibia_Grootberg - SouthAfrica_Buffelskloof; Namibia_Opuwo - SouthAfrica_Buffelskloof                                                                                                                                                                                                                                                                                                                                                                                                                                                                                                                                                                |
| 343.06607/456.52  | 7.0742 | 0.0002136  | 3.6704 | 7          | SouthAfrica_Buffelskloof; Namibia_Etuisis - SouthAfrica_Buffelskloof; Namibia_Grootberg - SouthAfrica_Buffelskloof; Namibia_Opuwo - SouthAfrica_Buffelskloof                                                                                                                                                                                                                                                                                                                                                                                                                                                                                                                                                                                                                                                                  |
| 463.08758/1103.42 | 6.7628 | 0.0002883  | 3.5402 | 2          | SouthAfrica_Buffelskloof - Namibia_Etuisis; SouthAfrica_Waterberg - Namibia_Etuisis; SouthAfrica_Buffelskloof - Namibia_Opuwo; SouthAfrica_Waterberg - Namibia_Opuwo                                                                                                                                                                                                                                                                                                                                                                                                                                                                                                                                                                                                                                                          |

**Table S2.** Metabolomic sampling table.

| <b>Metabolomic sampling table</b> |               |                       |                       |                        |                        |                         |
|-----------------------------------|---------------|-----------------------|-----------------------|------------------------|------------------------|-------------------------|
| <b>Country</b>                    | <b>Region</b> | <b>Accession name</b> | <b>Year collected</b> | <b>Month collected</b> | <b>Ionisation mode</b> | <b>Detection method</b> |
| Malawi                            | Zomba plateau | ZOM37                 | 2015                  | April                  | Negative               | LC-MS/MS                |
| Malawi                            | Zomba plateau | ZOM38                 | 2015                  | April                  | Positive               | LC-MS                   |
| Malawi                            | Zomba plateau | ZOM40                 | 2015                  | April                  | Negative               | LC-MS/MS                |
| Malawi                            | Zomba plateau | ZOM41                 | 2015                  | April                  | Negative               | LC-MS/MS                |
| Malawi                            | Ntcheu        | NT43                  | 2015                  | April                  | Negative               | LC-MS/MS                |
| Malawi                            | Ntcheu        | NT44                  | 2015                  | April                  | Positive               | LC-MS                   |
| Malawi                            | Ntcheu        | NT45                  | 2015                  | April                  | Negative               | LC-MS/MS                |
| Malawi                            | Ntcheu        | NT49                  | 2015                  | April                  | Negative               | LC-MS/MS                |
| Malawi                            | Banja Hill    | BAN51                 | 2015                  | April                  | Positive               | LC-MS/MS                |
| Malawi                            | Banja Hill    | BAN52                 | 2015                  | April                  | Negative               | LC-MS/MS                |
| Malawi                            | Banja Hill    | BAN54                 | 2015                  | April                  | Negative               | LC-MS/MS                |
| Malawi                            | Banja Hill    | BAN55                 | 2015                  | April                  | Negative               | LC-MS/MS                |
| Namibia                           | Opuwo         | OP1                   | 2014                  | October                | Negative               | LC-MS/MS                |
| Namibia                           | Opuwo         | OP2                   | 2014                  | October                | Positive               | LC-MS/MS                |
| Namibia                           | Opuwo         | OP3                   | 2014                  | October                | Negative               | LC-MS/MS                |
| Namibia                           | Opuwo         | OP4                   | 2014                  | October                | Negative               | LC-MS/MS                |
| Namibia                           | Opuwo         | OP5                   | 2014                  | October                | Negative               | LC-MS/MS                |
| Namibia                           | Grootberg     | GB10                  | 2014                  | October                | Positive               | LC-MS                   |
| Namibia                           | Grootberg     | GB11                  | 2014                  | October                | Negative               | LC-MS/MS                |
| Namibia                           | Grootberg     | GB13                  | 2014                  | October                | Negative               | LC-MS/MS                |
| Namibia                           | Grootberg     | GB19                  | 2014                  | October                | Positive               | LC-MS/MS                |
| Namibia                           | Grootberg     | GB22                  | 2015                  | August                 | Negative               | LC-MS/MS                |
| Namibia                           | Grootberg     | GB27                  | 2015                  | August                 | Negative               | LC-MS/MS                |
| Namibia                           | Grootberg     | GB28                  | 2015                  | August                 | Negative               | LC-MS/MS                |
| Namibia                           | Etusis        | ET17                  | 2014                  | October                | Negative               | LC-MS/MS                |
| Namibia                           | Etusis        | ET20                  | 2014                  | October                | Negative               | LC-MS/MS                |
| Namibia                           | Etusis        | ET23                  | 2014                  | October                | Positive               | LC-MS                   |
| Namibia                           | Etusis        | ET25                  | 2014                  | October                | Negative               | LC-MS/MS                |
| Namibia                           | Etusis        | ET29                  | 2015                  | August                 | Positive               | LC-MS/MS                |
| Namibia                           | Etusis        | ET30                  | 2015                  | August                 | Negative               | LC-MS/MS                |
| Namibia                           | Etusis        | ET34                  | 2015                  | August                 | Negative               | LC-MS/MS                |
| South Africa                      | Waterberg     | JILL57                | 2015                  | July                   | Positive               | LC-MS                   |
| South Africa                      | Waterberg     | JILL58                | 2015                  | July                   | Negative               | LC-MS/MS                |
| South Africa                      | Waterberg     | JILL59                | 2015                  | July                   | Negative               | LC-MS/MS                |
| South Africa                      | Waterberg     | JILL61                | 2015                  | July                   | Negative               | LC-MS/MS                |
| South Africa                      | Buffelskloof  | BK1                   | 2015                  | September              | Negative               | LC-MS/MS                |
| South Africa                      | Buffelskloof  | BK5                   | 2016                  | July                   | Negative               | LC-MS/MS                |
| South Africa                      | Buffelskloof  | BK6                   | 2016                  | July                   | Negative               | LC-MS/MS                |
