# Supplementary material for: Metabolomic Profiling of the Desiccation-Tolerant Medicinal Shrub Myrothamnus flabellifolia Indicates Phenolic Variability Across Its Natural Habitat: Implications for Tea and Cosmetics Production
Source: MDPI journal article supplement (doi:10.3390/molecules24071240), 2019-03-29
Supplement: s1 [file s1]

447.09235/1435.39 QUERCITRIN

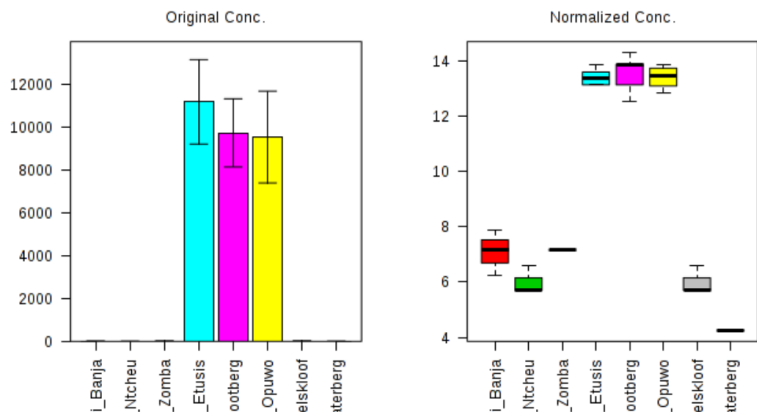

477.06707/1102.95 MIQUELIANIN

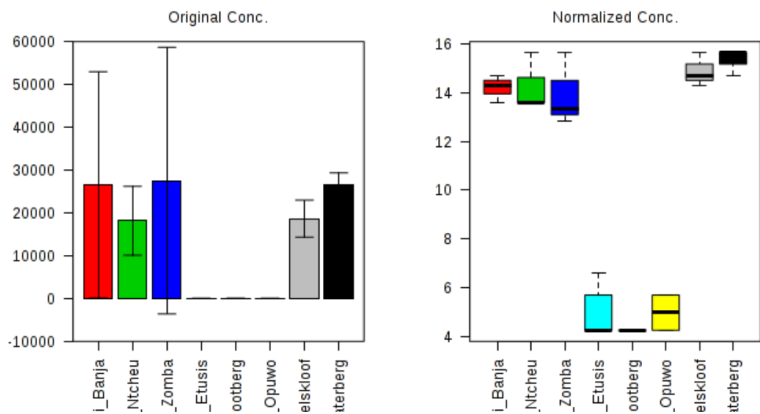

315.05037/1456.04 ISORHAMNETIN

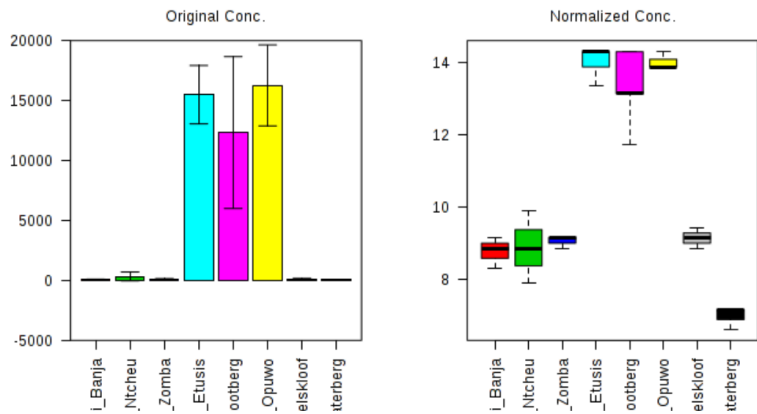

431.19157/858.76 ELLAGIC ACID DERIVATIVE

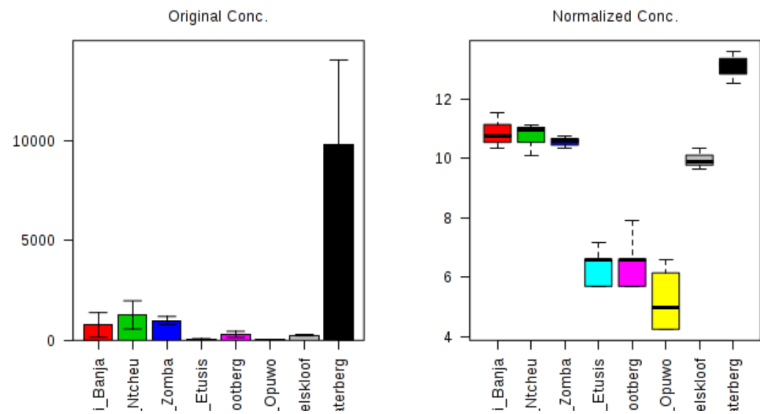

647.08836/840.21 3,4,5-TRI-O-GALLOYLQUINIC ACID

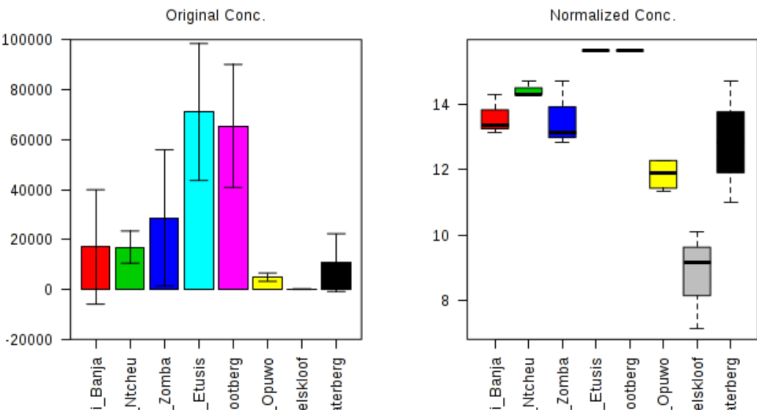

271.0812/107.62 NARINGENIN/ARBUTIN ISOMER

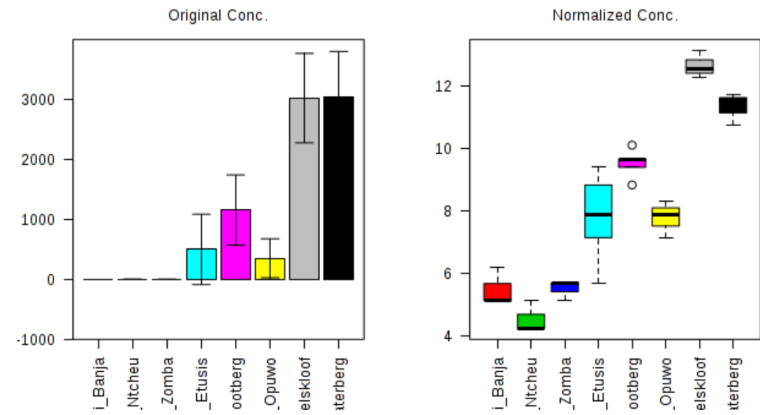

423.0925/722.6 QUINIC ACID DERIVATIVE

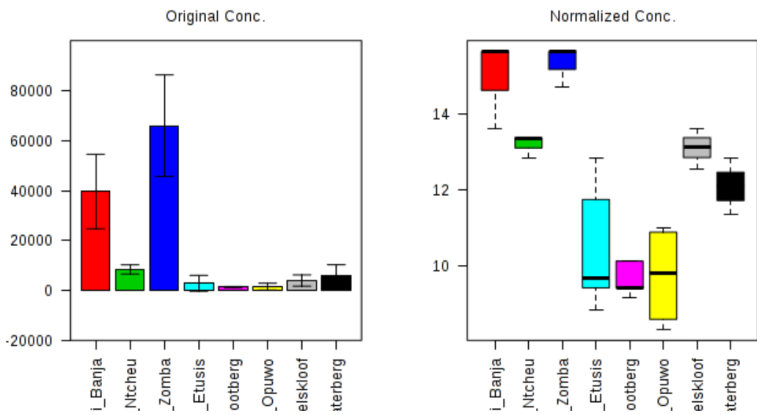

317.08729/341.39 QUINIC ACID DERIVATIVE

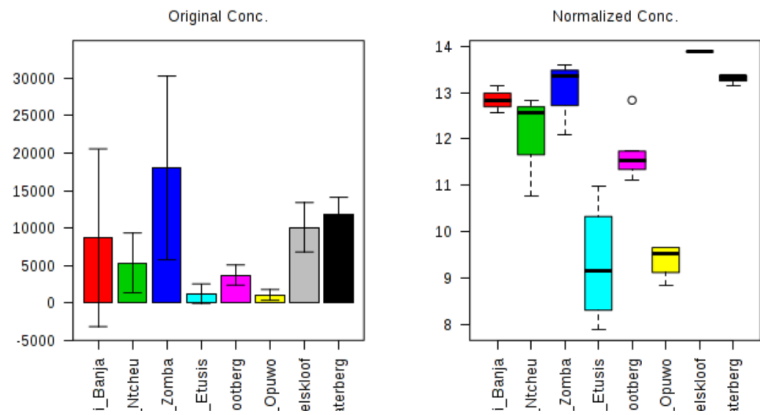

683.22481/100.94 CAFFEIC ACID GLYCOSIDE

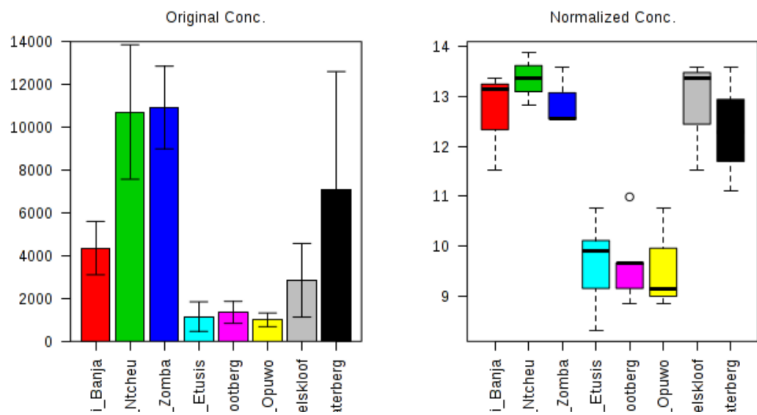

317.0865/107.4 QUINIC ACID DERIVATIVE

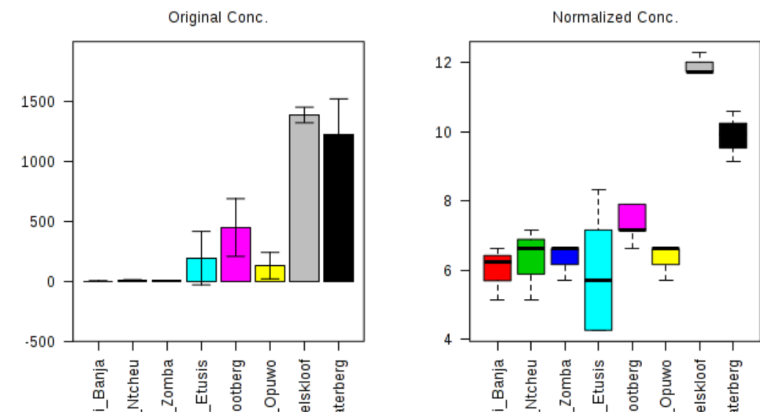

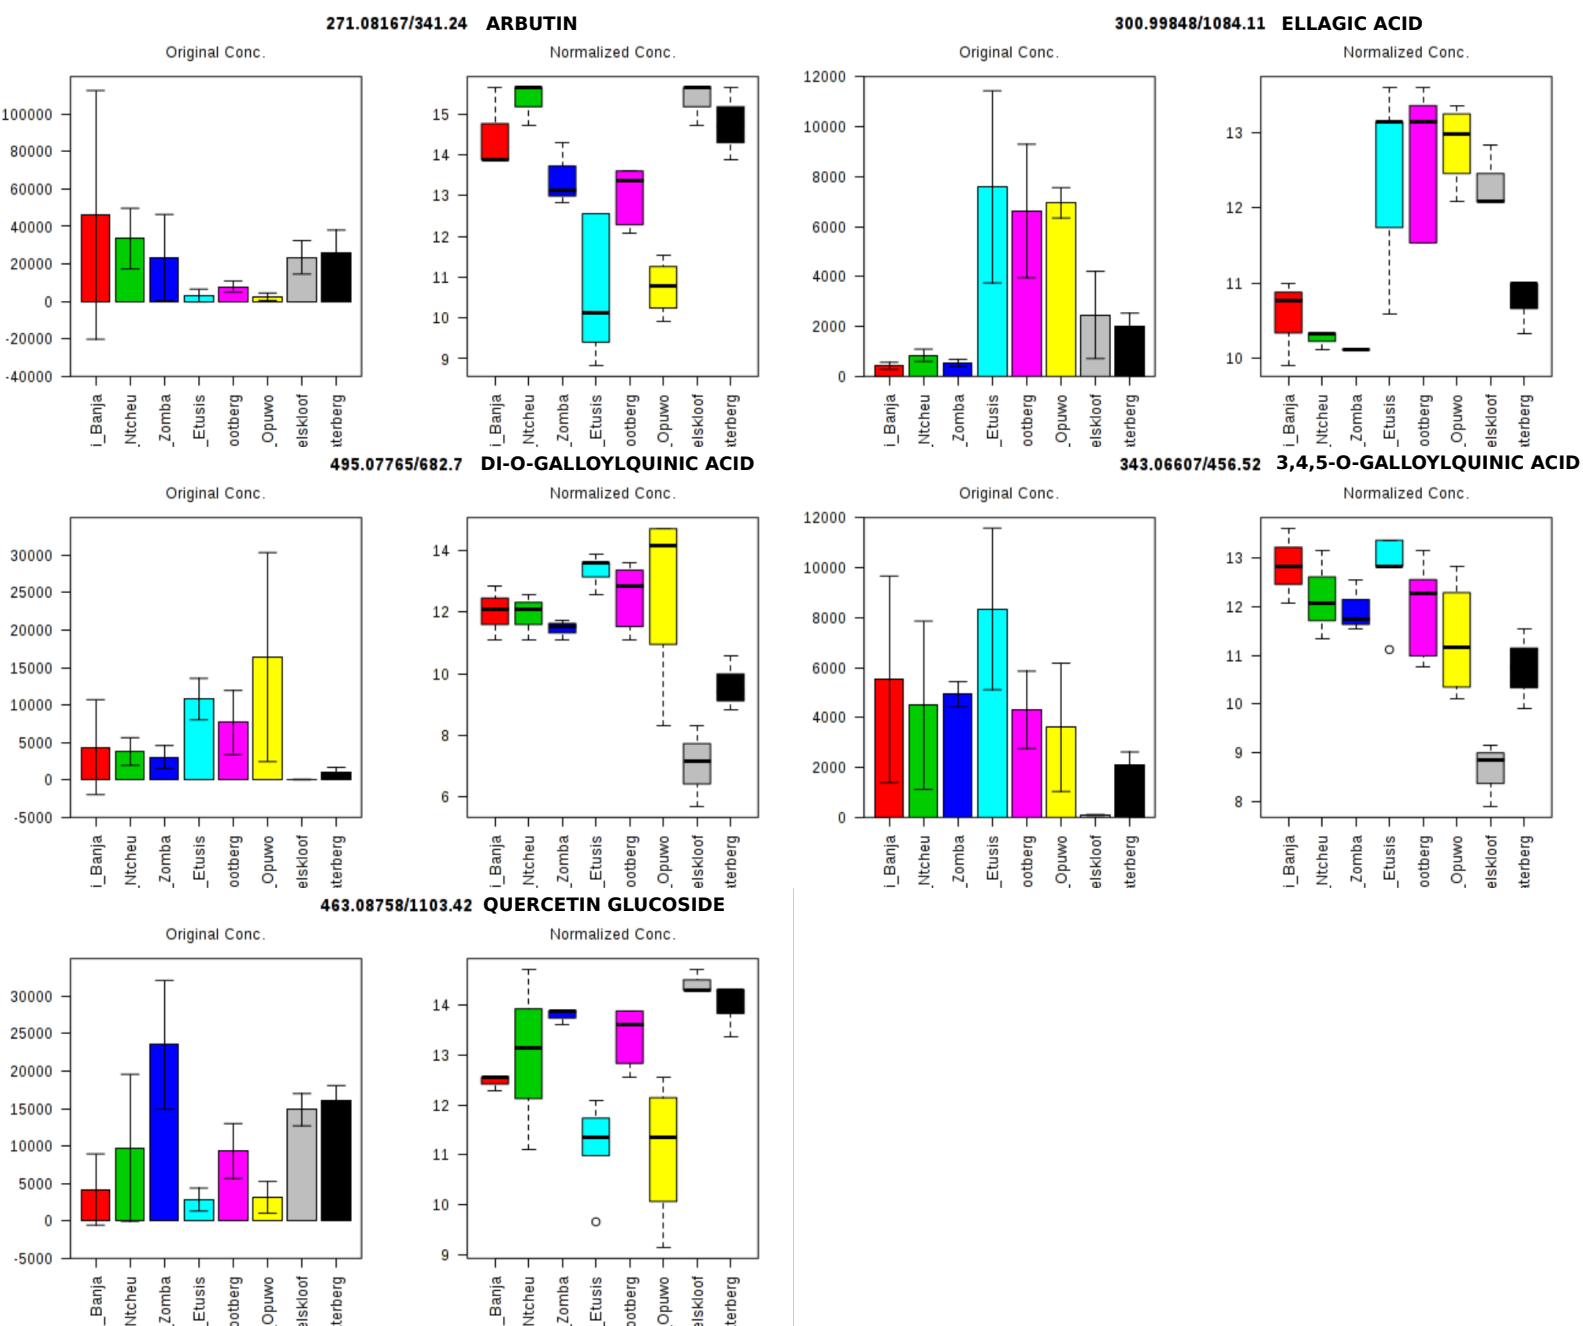

Figure S1: Box plots showing the abundances of the compounds (before and after transformation) deemed to differ significantly between the sampling sites at  $p < 0.001$
